# Supplementary material for: Enhanced photocatalytic activity of Ag2S particle decorated S-doped WO3 nanorods synthesized through two-stage vaporous vulcanization processes
Source: Royal Society of Chemistry journal article supplement (doi:10.1039/d3ce00281k), 2023-01-01
Supplement: d3ce00281k1.pdf [file d3ce00281k1.pdf]

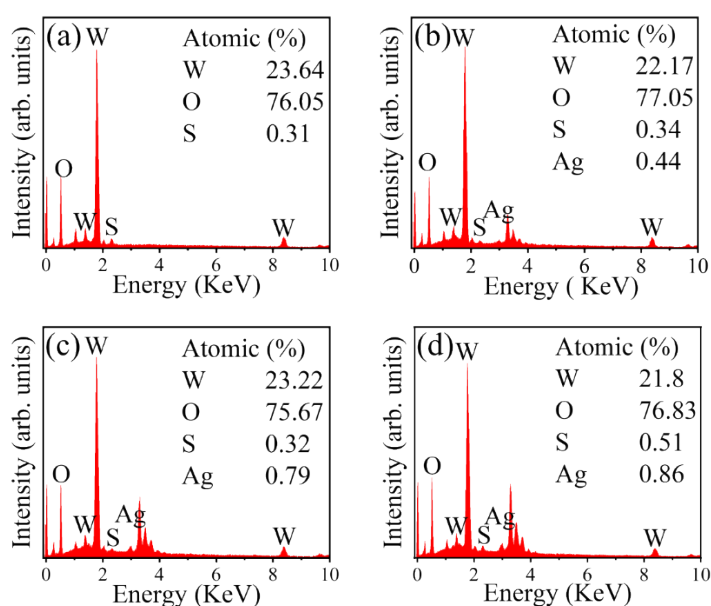

Fig. S1 SEM-EDS spectra: (a) S-WO<sub>3</sub>, (b) SWAS50, (c) SWAS100, and (d) SWAS150.

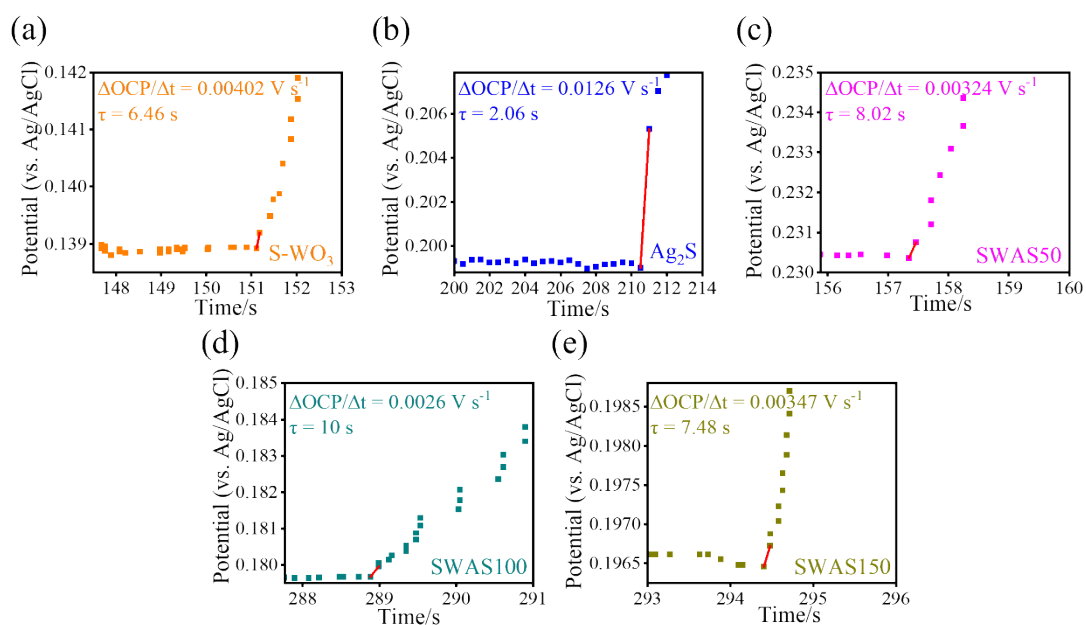

Fig. S2 The carrier lifetime of various samples derived from OCP decay curves at the transient when illumination is removed; (a) S-WO<sub>3</sub>, (b) Ag<sub>2</sub>S, (c) SWAS50, (d) SWAS100, and (e) SWAS150.
